# Supplementary material for: Non-H3 CDR template selection in antibody modeling through machine learning
Source: PubMed Central journal article supplement (PMC6330961; doi:10.7717/peerj.6179), 2019-01-11

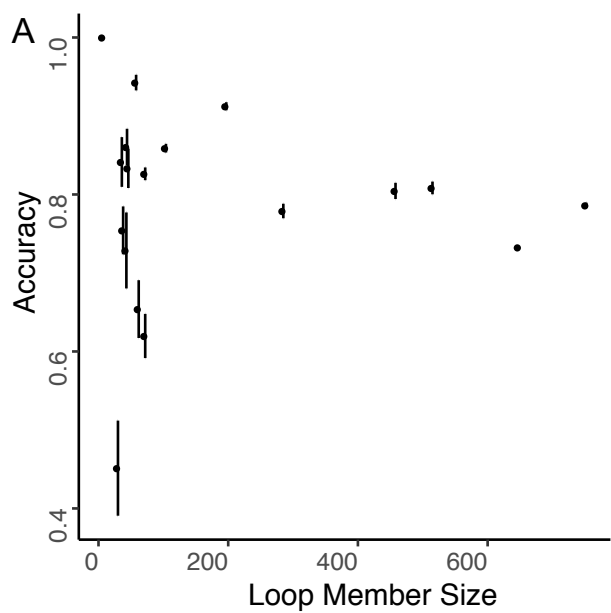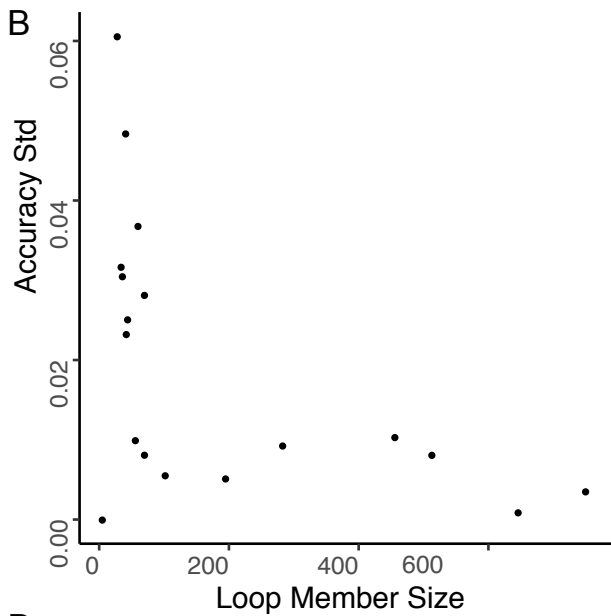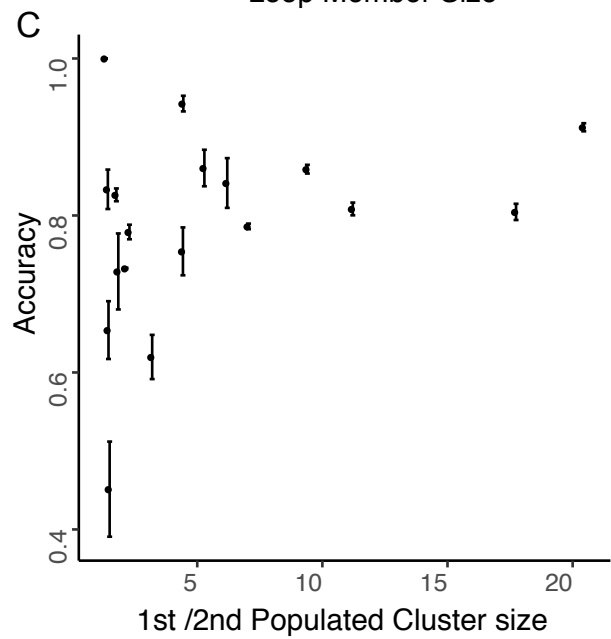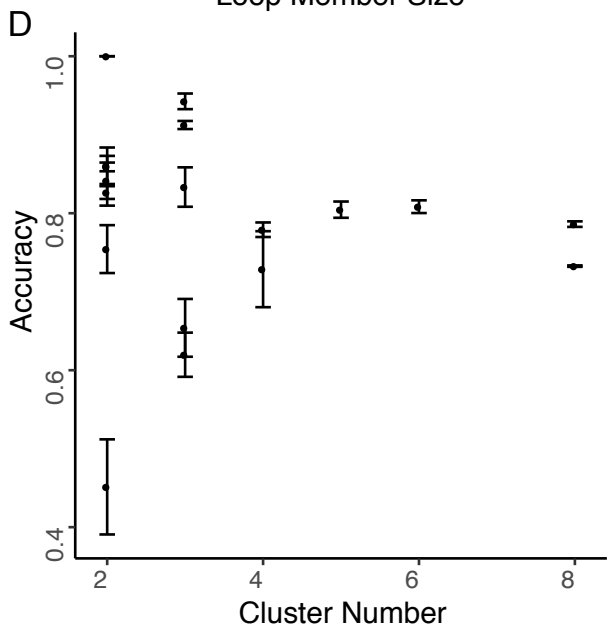

Supplement: peerj-07-6179-s001.pdf [file peerj-07-6179-s001.pdf]
